# Supplementary material
Source: PubMed Central journal article supplement (PMC3485699)

## Supplementary material:

### Interspecies electron transfer via H<sub>2</sub> and formate rather than direct electrical connections in co-cultures of *Pelobacter carbinolicus* and *Geobacter sulfurreducens*

Authors: Amelia-Elena Rotaru<sup>1\*</sup>, Pravin M. Shrestha<sup>1</sup>, Fanghua Liu<sup>1</sup>, Toshiyuki Ueki<sup>1</sup>, Kelly Nevin<sup>1</sup>, Zarath M. Summers<sup>1</sup> and Derek R. Lovley<sup>1</sup>

Affiliation: <sup>1</sup>Department of Microbiology, University of Massachusetts Amherst.

#### Figure 1SM

Consumption of ethanol, production of succinate, and lack of acetate accumulation in co-cultures of *G. metallireducens* and a *G. sulfurreducens* strain deficient in both formate dehydrogenase and hydrogenase activities. The results are the mean and standard deviation of triplicate cultures.

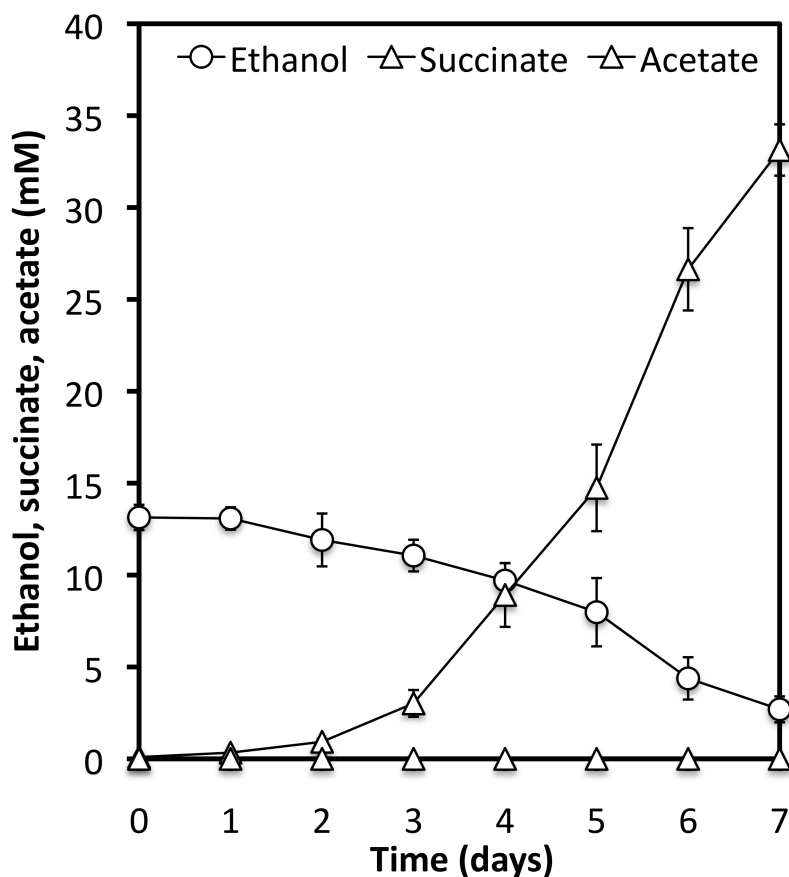

**Figure 2SM**

*G. sulfurreducens* and *P. carbinolicus* could not grow alone on a medium provided with the substrates for the co-cultures, ethanol (20 mM) as electron donor and fumarate (40 mM) as electron acceptor. Graph is a representation of culture triplicates for both microorganisms.

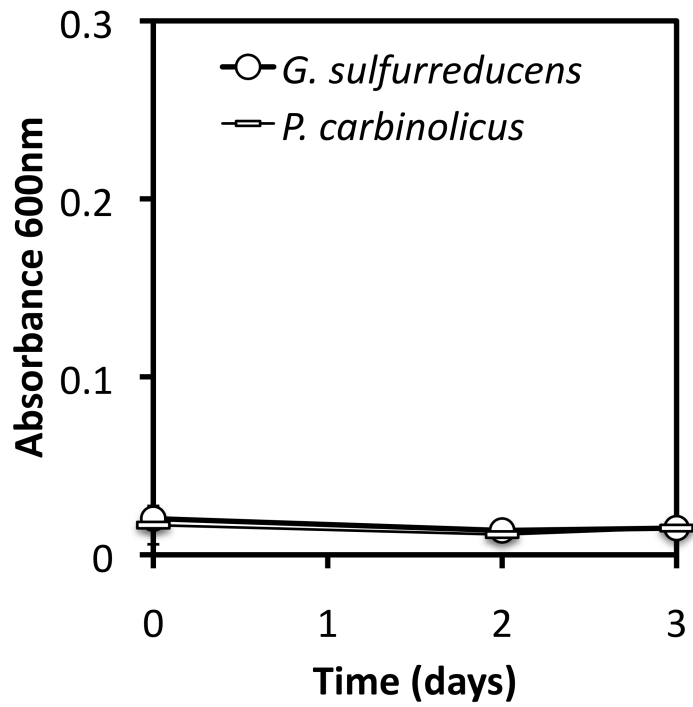

Supplement: AEM.01946-12_zam999103787so1.pdf [file AEM.01946-12_zam999103787so1.pdf]
